# Supplementary material for: Facile synthesis of polyaniline nanotubes and their enhanced stimuli-response under electric fields
Source: Royal Society of Chemistry journal article supplement (doi:10.1039/c4ra13635g), 2015-01-01
Supplement: c4ra13635g1.pdf [file c4ra13635g1.pdf]

Supporting Information

## Facile synthesis of polyaniline nanotubes and their enhanced stimuli-response under electric fields

Bomi Sim, Hyung Jin Choi\*

*Department of Polymer Science and Engineering, Inha University, Incheon 402-751, Korea*

*E-mail: hjchoi@inah.ac.kr; Fax: +82-32-865-5178; Tel: +82-32-860-7486*

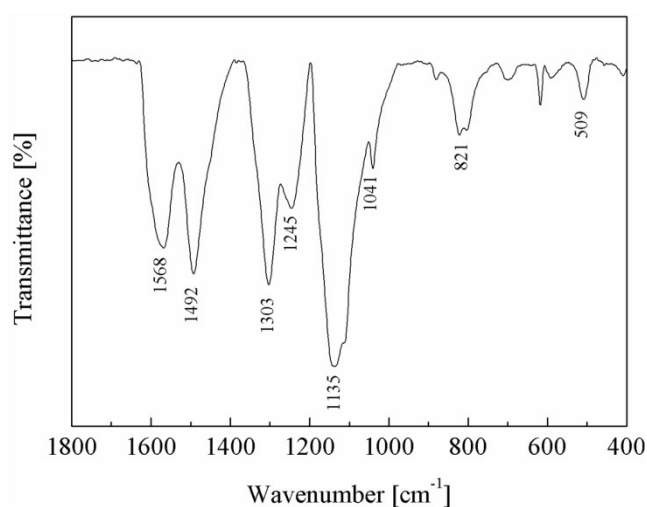

Fig. S1 FT-IR spectrum of the PANI nanotubes.

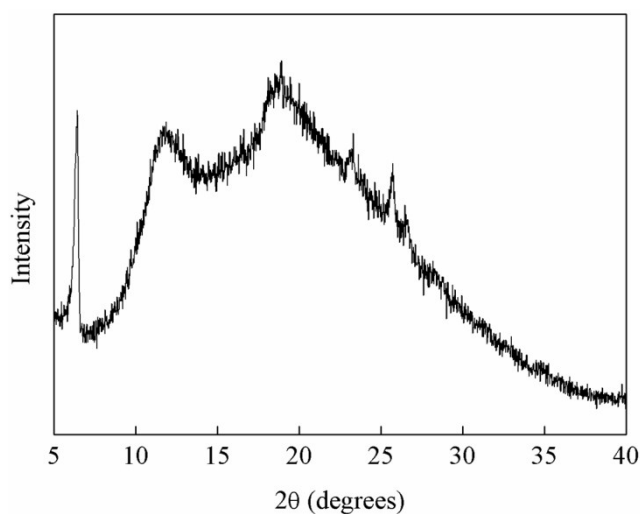

Fig. S2 XRD pattern of PANI nanotubes.

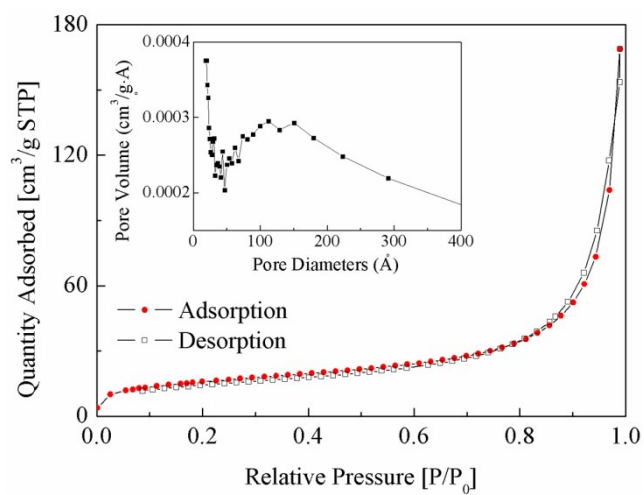

Fig. S3 Nitrogen adsorption/desorption isotherm of the PANI nanotubes. The corresponding pore size distribution curve (inset) was obtained from the absorption branch of the isotherm using the Barrett-Joyner-Halenda (BJH) method.
